# Supplementary material for: Radiation processing of polymers: The current status and prospects for the future
Source: Royal Society of Chemistry journal article supplement (doi:10.1039/c5sm00658a), 2004-01-01
Supplement: c5sm00658a1.pdf [file c5sm00658a1.pdf]

Electronic Supplementary Information for

## Gemini supra-amphiphiles with finely-controlled self-assemblies

Lijuan Shi,<sup>\*a</sup> Fuyu Chen,<sup>a</sup> Nan Sun<sup>b</sup> and Liqiang Zheng<sup>\*b</sup>

<sup>a</sup> Key Laboratory of Coal Science and Technology of Ministry of Education and Shanxi Province, Taiyuan University of Technology, Taiyuan 030024, China. Tel: +86-351-6010190; E-mail: [shilijuan@tyut.edu.cn](mailto:shilijuan@tyut.edu.cn)

<sup>b</sup> Key Laboratory of Colloid and Interface Chemistry, Shandong University, Ministry of Education, Jinan 250100, China. Tel: +86-531-88366062; E-mail: [lqzheng@sdu.edu.cn](mailto:lqzheng@sdu.edu.cn)

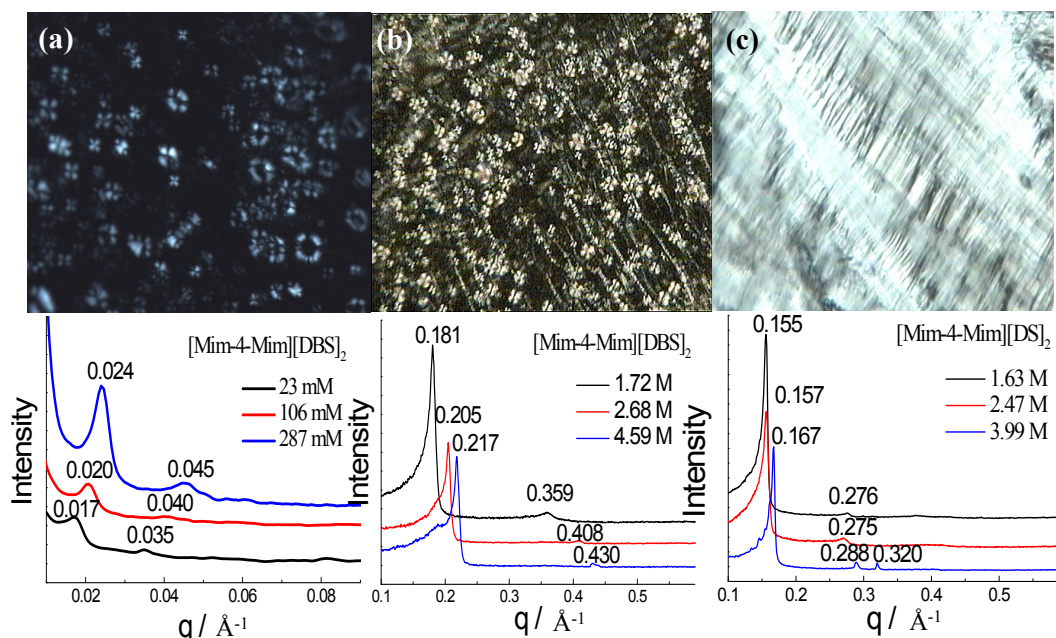

**Fig. S1** POM images (top) and SAXS curves (bottom) for  $L_{\alpha}$  (a) and LLC (b) phases in  $[\text{Mim-4-Mim}][\text{DBS}]_2$  aqueous solutions at 20 °C; (c) POM image (top) and SAXS curves (bottom) for  $H_I$  phase in  $[\text{Mim-4-Mim}][\text{DS}]_2$  aqueous solution at 20 °C.

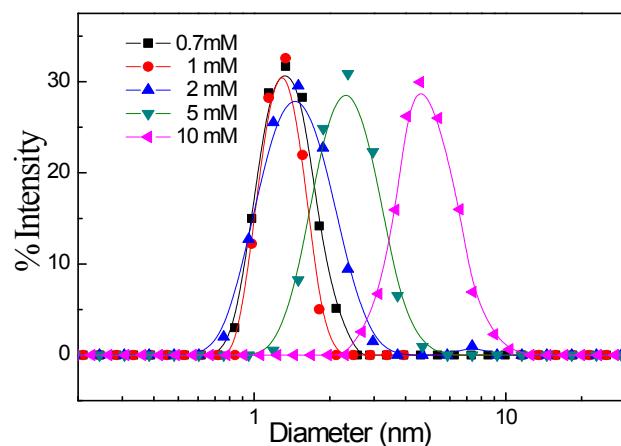

**Fig. S2** Size distributions of [Mim-4-Mim][DS]<sub>2</sub> aqueous solutions at different concentrations at 20 °C.

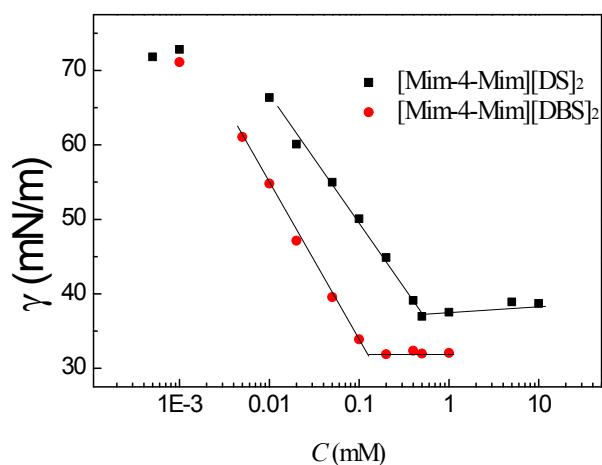

**Fig. S3** Surface tension curves of [Mim-4-Mim][DS]<sub>2</sub> and [Mim-4-Mim][DBS]<sub>2</sub> against their concentrations at 20 °C.

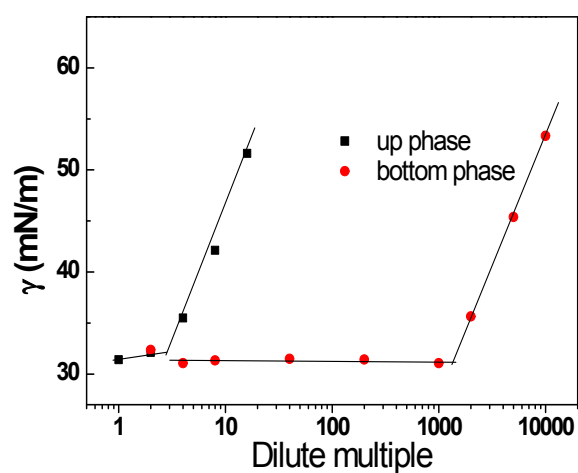

**Fig. S4** Surface tension of up and bottom phases with diluted multiple at 35 °C. Total [Mim-4-Mim][DBS]<sub>2</sub> concentration: 128 mM.

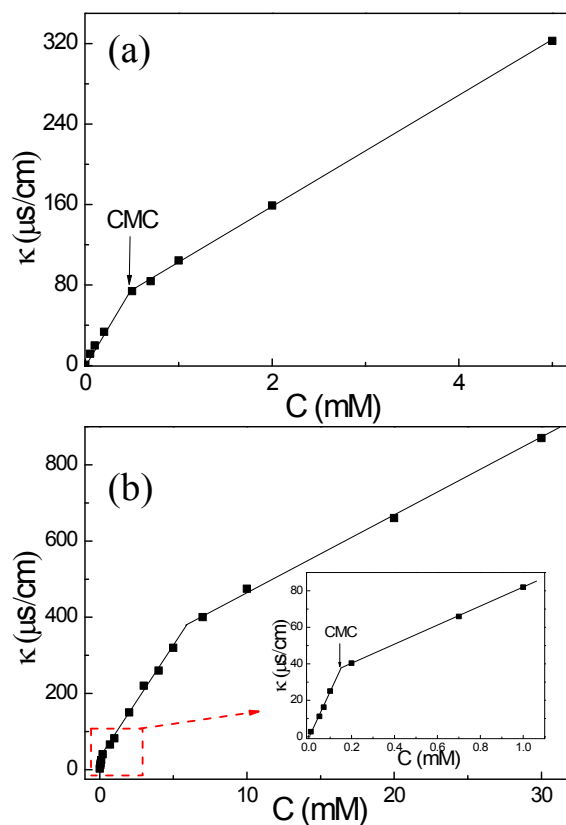

**Fig. S5** The plots of electrical conductivity against concentration of [Mim-4-Mim][DS]<sub>2</sub> (a) and [Mim-4-Mim][DBS]<sub>2</sub> (b) at 20 °C. The counterion dissociation degree ( $\alpha$ ) to micelles can be obtained from the ratio of the slope above and below CMC, and the  $\alpha$  value to vesicles is equal to the ratio of the slope above the concentration of vesicle formation and below CMC.<sup>1</sup> The counterion binding degree ( $\beta$ ) is equal to  $1-\alpha$ .<sup>1</sup>

## References

- (1) P. C. Shanks and E. I. Franses, *J. Phys. Chem.* 1992, **96**, 1794–1805.
